# Supplementary material for: Body temperature protein X-ray crystallography at 37 °C: a rhenium protein complex seeking a physiological condition structure
Source: Royal Society of Chemistry journal article supplement (doi:10.1039/d4cc04245j), 2024-01-01
Supplement: d4cc04245j2.pdf [file d4cc04245j2.pdf]

## Body temperature protein X-ray crystallography at 37°C: A rhenium protein complex seeking a physiological condition structure.

Francois J.F. Jacobs <sup>a</sup>, John R. Helliwell <sup>b\*</sup>, Alice Brink <sup>a\*</sup>

<sup>a</sup>. Department of Chemistry, University of the Free State, Nelson Mandela Drive, Bloemfontein, 9301, South Africa

<sup>b</sup>. Department of Chemistry, University of Manchester, Oxford Road, Manchester M13 9PL, United Kingdom.

Correspondence e-mail: john.helliwell@manchester.ac.uk

### Electronic Supplementary Information

#### Methods

**Crystallisation conditions are described in Jacobs et al., 2024 <sup>1</sup> and repeated below:**

HEWL (15.0 mg, 1.048  $\mu$ mol, 1 equivalence) was dissolved in water (0.5 ml). *fac*-[Et<sub>4</sub>N]<sub>2</sub>[Re(CO)<sub>3</sub>(Br)<sub>3</sub>] (11.8 mg, 0.015 mmol, 14.6 equivalence) was dissolved in water (0.5 ml). To the metal compound solution, imidazole was added (3.0 mg, 0.0441 mmol, 42.0 equivalence) and dissolved. A buffer solution of 50:50 1.0 M NaCl and 0.05 M sodium acetate buffer at 4.5 pH was prepared. The protein and metal solutions were combined. The protein-metal mixture was treated to 1ml of the buffer solution and gently blended. The protein-metal-buffer solution was transferred to a 96-well sitting drop plate with buffer in the reservoir and the cells sealed. Crystals were collected after 112 weeks for the 37°C dataset, from crystallization setup. In all instances, reproducible crystallization occurred within a week as described in the original publication.<sup>1</sup> Sensitivity of our crystal during data collection at 37°C is noted due to dehydration, X-ray radiation, etc. Practical advice<sup>2</sup> and other suggestions to greasing a crystal to assist the data collection in keeping the crystal stable; and additionally local unfolding of a protein (HEWL) as a function of temp has been studied including up to 325K.<sup>3</sup>

Additional comments: This structural study used co-crystallising protein with the rhenium protocols at room temperature. We did investigate crystallisation at 37°C which is certainly of interest, however the solubility inhibited the finding of crystallisation conditions. That said the high percentage solvent content of the protein crystal allowed the direct visualisation if the bound compounds disassociated from their binding sites; the covalent ones didn't whereas the non-covalent ones did, i.e. with substantially reduced occupancy, and into the solvent channels of the crystal.

HEWL is used as a model protein to explore chemical–structure relationships of rhenium in a biological setting. It is ideal as it provides a nearly complete range of possible amino acids. The caveat being that Cys and Met are not available for coordination as they are either disulfide bonded (Cys) or buried (Met) in HEWL. Although the protein itself is relatively easy to crystallize, the addition of rhenium, an 'unnatural' metal element, in our experience, hinders the crystallization process. SI Fig 1 indicates the three main metal complexations sites which are covalently bound to the protein.

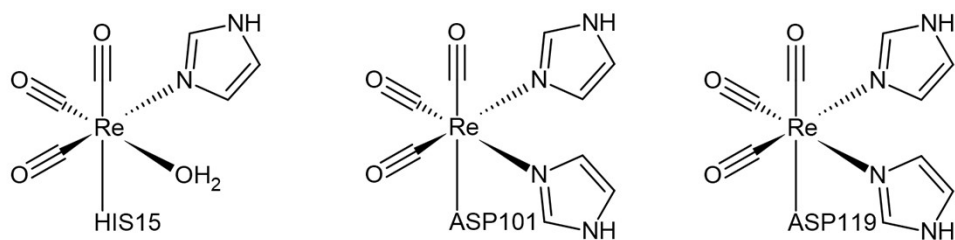

*fac*-[Re(CO)<sub>3</sub>(Imi)(H<sub>2</sub>O)(HIS15)]    *fac*-[Re(CO)<sub>3</sub>(Imi)<sub>2</sub>(ASP101)]    *fac*-[Re(CO)<sub>3</sub>(Imi)<sub>2</sub>(ASP119)]

**SI Figure 1:** Line drawing of the three main metal complexation sites which are covalently bound to the protein.

#### Crystal sample mounting:

The crystals were carefully removed from the sitting drop by a nylon loop fitted to a magnetic base pin. The crystal was quickly covered by a MiTeGen capillary to prevent dehydration of the crystal. Within the MiTeGen capillary, a few drops of the mother liquor were placed to prevent dehydration, from either the buffer solution, or alternatively deionised water was also found to work well provided no contact was made with the crystal. Prior to crystal mounting the capillary was shortened to prevent collisions within the dual wavelength diffractometer during rotation.

#### Diffractometer data collection:

The data collection was conducted on a Bruker D8 Venture 4K Kappa Photon III C28 diffractometer fitted with two wavelength sources namely a Mo-K $\alpha$  X-ray generator with a wavelength of  $\lambda = 0.71073 \text{ \AA}$  and a Cu-K $\alpha$  anode producing X-ray at  $\lambda = 1.54178 \text{ \AA}$  the latter being used for the data collections of this study. The Oxford temperature control unit allows for high temperature data collections of 37°C.

#### Data reduction and refinement:

Diffraction data processing was achieved using the Bruker PROTEUM4 software suite, space group determination with POINTLESS<sup>4</sup> and the scaling of the data with AIMLESS.<sup>5</sup> The diffraction resolution cut-off of the data was that suggested by POINTLESS and AIMLESS. The resolution was confirmed by checking to ensure sufficient completeness in the high-resolution shells. Molecular replacement in Phaser<sup>6</sup> and the PDB entry 2w1y<sup>7</sup> were used. Refinement of the molecular models was done using Phenix.<sup>8</sup> Viewing and further optimization was conducted in Coot.<sup>9</sup> The diffraction images indicated the presence of two domains within the selected crystal. The structure was refined from the major domain. The mounted crystal moved within the capillary at frame 45 and data was integrated in two sets (frames 1-45 & 46-90) to accommodate for the slippage. Molecular images were created using UCFS Chimera.<sup>10</sup>

Data availability: The final protein model and the processed diffraction data, as well as the PDB Validation report, are attached to this article or found on the wwPDB. The raw diffraction images zip file is available at Zenodo (<https://zenodo.org/>) doi: 10.5281/zenodo.13331546. For the highest resolution structure of this complex at 100K the reader is referred to 8QCU held at the wwPDB.

#### Data accessibility:

For readers not used to accessing PDB files, tutorial videos and guidelines are available at <https://pdb101.rcsb.org>. For use of Zenodo for raw diffraction images deposition and access see Kroon-Batenburg.<sup>11</sup> Additional note, the crystallographic community is still addressing the challenge of interoperability for 2D representation of organometallic complexes extracted from macromolecular data. Automatic software pipelines were developed for large organic molecules (containing C, N, O, H, etc atoms) with well understood organic geometry, however challenges still occur in fully defining metal bonding. The reader should note that the molecular geometry of the

organometallic may be distorted through the automatic macromolecular pipeline servers and are encouraged to review the original paper for the correct metal-based geometry.

**Additional comments – metal mechanistic stability at 37°C versus 40°C:**

In a clinical setting, the acceptable average for healthy individuals is 37°C, while for an acutely sick patient the patient's temperature may reach 40°C, but such a small change it is unlikely to affect the metal binding of a compound to a protein. From chemical kinetic reaction studies, the substitution rate constant of the organometallic tends to double for each 10°C increase in temperature.<sup>12, 13, 14, 15, 16</sup> Chemical mechanistic changes for organometallics, within the temperature range of interest (25-45°C), tend to be solvent, ligand, pH, metal dependent, etc <sup>17, 18, 19, 20, 21</sup> and therefore, to the best of our knowledge, significant rhenium metal binding mechanistic changes are not expected to occur within the limited temperature span of 37 - 40 °C.

Table 1: 1 X-ray crystallographic data and model-refinement statistics for the 37°C crystal structure in comparison to 100K. Statistics for the highest-resolution shell are shown in parentheses.

|                                        | 100K                                |  | 37°C                                |  |
|----------------------------------------|-------------------------------------|--|-------------------------------------|--|
| <b>Data reduction</b>                  |                                     |  |                                     |  |
| Space group                            | <i>P4<sub>3</sub>2<sub>1</sub>2</i> |  | <i>P4<sub>3</sub>2<sub>1</sub>2</i> |  |
| Unit cell parameters (Å, °)            | 81.12(1) 81.12(1) 37.19(3)          |  | 81.49(1) 81.49(1) 37.41(3)          |  |
|                                        | $\alpha = \beta = \gamma = 90$      |  | $\alpha = \beta = \gamma = 90$      |  |
| Molecules per asymmetric unit          | 1                                   |  | 1                                   |  |
| Detector                               | Eiger2 XE 16M                       |  | Photon III C28                      |  |
| Crystal to detector distance (mm)      | 168.3                               |  | 70.0                                |  |
| X-ray source                           | DLS                                 |  | Lab Cu K $\alpha$                   |  |
| X-ray wavelength (Å)                   | 0.976                               |  | 1.54                                |  |
| Observed reflections                   | 87971 (7685)                        |  | 13693 (1276)                        |  |
| Unique reflections                     | 44171 (3979)                        |  | 6862 (647)                          |  |
| Resolution (Å)                         | 36.28 - 1.15 (1.191 - 1.15)         |  | 36.44 - 2.19 (2.27 - 2.19)          |  |
| Completeness (%)                       | 98.87 (89.54)                       |  | 99.3 (95.5)                         |  |
| $R_{\text{merge}}$                     | 0.090 (2.098)                       |  | 0.218 (1.285)                       |  |
| $R_{\text{p.i.m.}}$                    | 0.018 (0.854)                       |  | 0.134 (0.993)                       |  |
| $\langle I/\sigma(I) \rangle$          | 21.34 (0.78)                        |  | 5.2 (0.8)                           |  |
| Multiplicity                           | 21.0 (6.4)                          |  | 6.1 (4.4)                           |  |
| Mn(II) half-set correlation $CC_{1/2}$ | 0.994 (0.448)                       |  | 0.985 (0.434)                       |  |
| Cruickshank DPI (Å)                    | 0.022                               |  | 0.161                               |  |
| Average B-factor (Å <sup>2</sup> )     | 23                                  |  | 36                                  |  |
| <b>Refinement</b>                      |                                     |  |                                     |  |
| $R$ factor                             | 0.158 (0.3570)                      |  | 0.2040 (0.3160)                     |  |
| $R_{\text{free}}$                      | 0.177 (0.3969)                      |  | 0.2712 (0.4024)                     |  |
| R.m.s.d. angles (°)                    | 1.15                                |  | 1.48                                |  |
| Ramachandran plot values (%)           |                                     |  |                                     |  |
| Most favoured                          | 98.43                               |  | 96.06                               |  |
| Additional allowed                     | 1.57                                |  | 3.94                                |  |
| Disallowed                             | 0.00                                |  | 0.00                                |  |
| PDB code / Data access                 | 8QCU                                |  | 9GHX                                |  |

Table 2. Comparison of all bound ligands (Cl, Na, Re, etc) and waters at 100K and at 37°C specifying B-factors and occupancies where appropriate.

| Relevant Residue             | 8QCU (100K)  | B (Å <sup>2</sup> ) 100 K | Occup. (%) |  | 37 °C        | B (Å <sup>2</sup> ) C | Occup. (%) | Notes                                |
|------------------------------|--------------|---------------------------|------------|--|--------------|-----------------------|------------|--------------------------------------|
|                              | Cl 201       | 25                        | 1          |  | Cl 202       | 50                    | 1          |                                      |
|                              | Cl 202       | 23                        | 1          |  | Cl 203       | 43                    | 1          |                                      |
|                              | Cl 203       | 40                        | 1          |  |              |                       |            |                                      |
|                              | Cl 204       | 41                        | 1          |  | Cl 211       | 71                    | 1          |                                      |
|                              | Cl 216       | 41                        | 1          |  |              |                       |            |                                      |
|                              | Br 217       | 25                        | 1          |  | HOH 31       | 49                    | 1          | Atom in 37°C is offset to 100 K data |
|                              |              |                           |            |  |              |                       |            |                                      |
|                              | Na 205       | 22                        | 1          |  | Na 208       | 36                    | 1          |                                      |
| <b>Covalently Bound Re's</b> |              |                           |            |  |              |                       |            |                                      |
| Asp 101                      | VHL 206 (Re) | 24                        | 0.43       |  | VHL 205 (Re) | 78                    | 0.55       |                                      |
| Asp119                       | VHL 208 (Re) | 21                        | 0.53       |  | VHL 204 (Re) | 47                    | 0.53       |                                      |
| His 15                       | REI 207 (Re) | 34                        | 0.84       |  | REI 206 (Re) | 60                    | 0.94       |                                      |
| <b>Non-covalent Re's</b>     |              |                           |            |  |              |                       |            |                                      |
| Asp 18                       | Re 210       | 32                        | 0.17       |  | -            |                       |            | No anomalous density                 |
| Leu129 /                     | Re 211       | 34                        | 0.21       |  | Re 210       | 47                    | 0.15       |                                      |

|                                |         |     |      |  |         |    |                                        |
|--------------------------------|---------|-----|------|--|---------|----|----------------------------------------|
| Arg 14                         |         |     |      |  |         |    |                                        |
| In vicinity of Arg 14 & His 15 | Re 212  | 21  | 0.1  |  | Re 209  | 56 | 0.15                                   |
|                                | Re 213  | 21  | 0.23 |  | Cl 201  | 34 | 1                                      |
|                                | Re 214  | 102 | 0.26 |  | -       |    | No density to confirm Re placement.    |
|                                | Re 215  | 33  | 0.13 |  | -       |    | No density to confirm Re placement.    |
| <b>Waters</b>                  |         |     |      |  |         |    |                                        |
|                                | HOH 301 | 25  | 1    |  |         |    |                                        |
|                                | HOH 302 | 37  | 1    |  |         |    |                                        |
|                                | HOH 303 | 30  | 1    |  |         |    |                                        |
|                                | HOH 304 | 36  | 1    |  |         |    |                                        |
|                                | HOH 305 | 28  | 1    |  |         |    |                                        |
|                                | HOH 306 | 34  | 1    |  |         |    |                                        |
|                                | HOH 307 | 30  | 1    |  |         |    |                                        |
|                                | HOH 308 | 38  | 1    |  |         |    |                                        |
|                                | HOH 309 | 38  | 1    |  |         |    |                                        |
|                                | HOH 310 | 26  | 1    |  |         |    |                                        |
|                                | HOH 311 | 22  | 1    |  | HOH 306 | 37 | 1                                      |
|                                | HOH 312 | 21  | 1    |  | HOH 304 | 40 | 1                                      |
|                                | HOH 313 | 47  | 1    |  |         |    |                                        |
|                                | HOH 314 | 30  | 1    |  |         |    |                                        |
|                                | HOH 315 | 21  | 1    |  | HOH 310 | 40 | 1                                      |
|                                | HOH 316 | 31  | 1    |  |         |    |                                        |
|                                | HOH 317 | 28  | 1    |  | HOH 321 | 23 | 1                                      |
|                                | HOH 318 | 17  | 1    |  | HOH 309 | 26 | 1                                      |
|                                | HOH 319 | 25  | 1    |  | HOH 301 | 54 | 1                                      |
|                                | HOH 320 | 18  | 1    |  | HOH 308 | 28 | 1                                      |
|                                | HOH 321 | 38  | 1    |  |         |    | Atom in 37°C is offset from 100 K data |
|                                | HOH 322 | 38  | 1    |  |         |    | Symmetry equivalent position           |
|                                | HOH 323 | 27  | 1    |  |         |    |                                        |
|                                | HOH 324 | 33  | 1    |  |         |    |                                        |
|                                | HOH 325 | 26  | 1    |  |         |    |                                        |
|                                | HOH 326 | 32  | 1    |  |         |    |                                        |
|                                | HOH 327 | 30  | 1    |  |         |    |                                        |
|                                | HOH 328 | 20  | 1    |  | HOH 302 | 39 | 1                                      |
|                                | HOH 329 | 23  | 1    |  |         |    |                                        |
|                                | HOH 330 | 26  | 1    |  |         |    |                                        |
|                                | HOH 331 | 22  | 1    |  |         |    |                                        |
|                                | HOH 332 | 37  | 1    |  |         |    |                                        |
|                                | HOH 333 | 26  | 1    |  |         |    |                                        |
|                                | HOH 334 | 30  | 1    |  |         |    |                                        |
|                                | HOH 335 | 29  | 1    |  |         |    |                                        |
|                                | HOH 336 | 23  | 1    |  | HOH 318 | 36 | 1                                      |
|                                | HOH 337 | 27  | 1    |  |         |    |                                        |
|                                | HOH 338 | 30  | 1    |  |         |    |                                        |
|                                | HOH 339 | 28  | 1    |  |         |    |                                        |
|                                | HOH 340 | 31  | 1    |  |         |    |                                        |
|                                | HOH 341 | 30  | 1    |  |         |    |                                        |
|                                | HOH 342 | 46  | 1    |  |         |    |                                        |
|                                | HOH 343 | 28  | 1    |  |         |    |                                        |
|                                | HOH 344 | 29  | 1    |  |         |    |                                        |
|                                | HOH 345 | 44  | 1    |  |         |    |                                        |
|                                | HOH 346 | 23  | 1    |  |         |    |                                        |
|                                | HOH 347 | 36  | 1    |  |         |    |                                        |



Table 3: Rhenium occupancy values, anomalous difference map peak heights and residual  $F_o - F_c$  densities as found at 100K and 37°C. The number of weeks soaked in mother liquor as specified by Jacobs et al., 2024 is indicated. At the synchrotron the 38 weeks data were also measured at attenuated intensity and a wavelength identical to  $\text{CuK}\alpha$ , useful to assess the impact of diffraction resolution in the modelling; see second column at 100K.

| Temperature, wavelength and time (in weeks from crystallisation) | 100K                      |      |          | 100 K            |        |          | 37°C                       |     |          |
|------------------------------------------------------------------|---------------------------|------|----------|------------------|--------|----------|----------------------------|-----|----------|
|                                                                  | Week 38 (0.976 Å)<br>8QCU |      |          | Week 38 (1.54 Å) |        |          | Week 112, (1.54 Å)<br>9GHX |     |          |
| Resolution                                                       | 1.15 Å                    |      |          | 1.76 Å           |        |          | 2.2 Å                      |     |          |
| Residue                                                          | $\Sigma$                  | P    | $\Delta$ | $\Sigma$         | $\rho$ | $\Delta$ | $\Sigma$                   | P   | $\Delta$ |
| Covalent sites                                                   |                           |      |          |                  |        |          |                            |     |          |
| HIS15                                                            | 0.84                      | 55.5 | 5.5      | 0.84             | 35.2   | 12.1     | 0.94                       | 6.8 | 5.4      |
| ASP18                                                            | 0.17                      | 8.6  | -        | 0.18             | 5.8    | -        | -                          | -   | -        |
| ASN46                                                            | -                         | -    | -        | -                | -      | -        | -                          | -   | -        |
| ASP52                                                            | -                         | -    | -        | -                | -      | -        | -                          | -   | -        |
| ASP101                                                           | 0.43                      | 39.4 | 9.7      | 0.56             | 35.2   | 8.5      | 0.55                       | 3.6 | 4.3      |
| ASP119                                                           | 0.53                      | 54.6 | 4.0      | 0.57             | 30.9   | 5.0      | 0.53                       | 5.5 | 3.5      |
| Other sites                                                      |                           |      |          |                  |        |          |                            |     |          |
| ARG14/His15                                                      | 0.10                      | 21.5 | 6.7      | 0.17             | 12.5   | 4.1      | 0.15                       | -   | 5.1      |
| TYR23                                                            | 0.23                      | 3.3  | 3.6      | 0.31             | 6.5    | -        | -                          | -   | -        |
| PRO70                                                            | 0.13                      | 7.8  | -        | 0.14             | 5.5    | -        | -                          | -   | -        |
| ASP101                                                           | -                         | -    | -        | -                | -      | -        | -                          | -   | -        |
| TRP123                                                           | 0.26                      | 4.2  | -        | 0.28             | 3.5    | -        | -                          | -   | -        |
| ASP129                                                           | 0.21                      | 9.1  | -        | 0.34             | 6.1    | 3.7      | 0.15                       | -   | 4.6      |

<sup>$\Sigma$</sup> ) Metal site occupancy;  <sup>$\rho$</sup> ) Anomalous density ( $\sigma$ );  <sup>$\Delta$</sup> ) Residual  $F_o - F_c$  density ( $\sigma$ ).

## References

- <sup>1</sup> Jacobs, F. J. F., Helliwell, J. R. & Brink, A. (2024). *IUCr.*, 11, 359–373.
- <sup>2</sup> Fischer, M. (2021). *Q. Rev. Biophys.* 54, e1, 1–15.
- <sup>3</sup> De Sá Ribeiro, F., Lima., L.M.T.R., (2023). *Biophys. Chem.*, 107027-107039.
- <sup>4</sup> Evans, P. R. (2011). *Acta. Cryst. D.* 67, 282–292.
- <sup>5</sup> Evans, P. R., Murshudov, G. N. (2013). *Acta. Cryst. D.* 69, 1204–1214.
- <sup>6</sup> McCoy, A. J. (2007). *Acta. Cryst. D.* 63, 32–41.
- <sup>7</sup> Cianci, M., Helliwell, J. R. & Suzuki, A. (2008). *Acta Cryst. D*64, 1196–1209.

- 
- <sup>8</sup> Liebschner, D., Afonine, P. V., Baker, M. L., Bunkoczi, G., Chen, V. B., Croll, T. I., Hintze, B., Hung, L. W., Jain, S., McCoy, A. J., Moriarty, N. W., Oeffner, R. D., Poon, B. K., Prisant, M. G., Read, R. J., Richardson, J. S., Richardson, D. C., Sammito, M. D., Sobolev, O. V., Stockwell, D. H., Terwilliger, T. C., Urzhumtsev, A. G., Videau, L. L., Williams, C. J. & Adams, P. D. (2019). *Acta Cryst. D.* 75, 861–877.
- <sup>9</sup> Emsley, P., Lohkamp, B., Scott, W. G. & Cowtan, K. (2010). *Acta Cryst. D.* 66, 486–501.
- <sup>10</sup> UCFS Chimera (version 1.16), Pettersen, E. F., Goddard, T. D., Huang, C. C., Couch, G. S., Greenblatt, D. M., Meng, E. C. & Ferrin, T. E. (2004). *J. Comput. Chem.* 25, 1605–1612.
- <sup>11</sup> Kroon-Batenburg, L.M.J. (2023), *Acta Cryst. F.*, 79, 267-273.
- <sup>12</sup> Brink, A., Visser, H.G., Roodt, A. (2013) *Inorg. Chem.*, 52, 8950- 8961.
- <sup>13</sup> Brink, A., Visser, H.G., Roodt, A. (2024) *Inorg. Chem.*, 53, 12480-12488.
- <sup>14</sup> Jacobs, F.J.F., Venter, G.J.S., Muller, E., Kroon, R.E., Brink, A. (2021) *RSC Advance*, 11, 24443-24455.
- <sup>15</sup> Schutte-Smith, M., Roodt, A., Visser, H.G., (2019) *Dalton Trans.*, 48, 9984-9997.
- <sup>16</sup> Schutte-Smith, M., Marker, S.C., Wilson, J.J., Visser, H.G., (2020) *Inorg. Chem.* 59, 15888–15897.
- <sup>17</sup> Roodt, A., Visser, H.G., Brink, A. (2011), *Crystallography Reviews*, 17, 241-280.
- <sup>18</sup> Wilkins, R.G., (1991) *Kinetics and Mechanism of Reactions of Transition Metal Complexes*, Wiley-VCH Verlag GmbH & Co.
- <sup>19</sup> Salignac, B., Grundler, P. V., Cayemittes, S., Frey, U., Scopelliti, R., Merbach, A. E., Hedinger, R., Hegetschweiler, K., Alberto, R., Prinz, U., Raabe, G., Kolle, U., Hall, S. (2003) *Inorg. Chem.* 42, 3516–3526.
- <sup>20</sup> Grundler, P. V., Helm, L., Alberto, R., Merbach, A. E. (2006) *Inorg. Chem.* 45, 10378–10390.
- <sup>21</sup> Pike, S.D., Weller, A.S., (2015), *Phil. Trans. R. Soc. A* 373, 20140187, 1-24.
